# Supplementary material for: BlueP encapsulated Janus MoSSe as a promising heterostructure anode material for LIBs
Source: Royal Society of Chemistry journal article supplement (doi:10.1039/d4cp00940a), 2024-01-01
Supplement: d4cp00940a1.pdf [file d4cp00940a1.pdf]

## BlueP Encapsulated Janus MoSSe as Promising Heterostructure Anode Materials for LIBs

Gayatree Barik<sup>1</sup> and Sourav Pal<sup>2\*</sup>

<sup>1</sup>Department of Chemistry, S.C.S. (Autonomous) College, Puri-752001, Odisha, India

<sup>2</sup>Department of Chemistry, Ashoka University, Sonapat-131029, Haryana, India

Email: sourav.pal@ashoka.edu.in

**Fig. S1: (i)** Phonon dispersion spectra of various stacking configurations of BlueP-SMoSe heterostructure. (a) All P atoms above Mo and S atoms (b) All P atoms above S atoms. (c) All P atoms above Mo atoms.

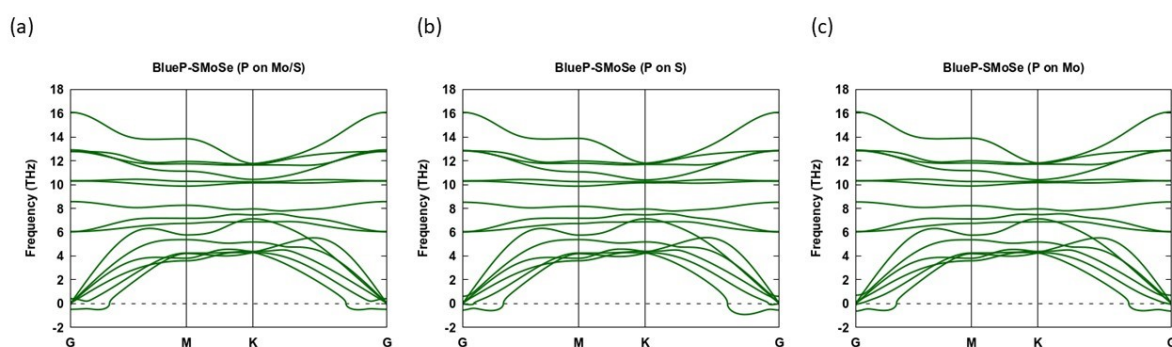

**Fig. S1: (ii)** Phonon dispersion spectra of various stacking configurations of BlueP-SeMoS heterostructure. (a) All P atoms above Mo and Se atoms (b) All P atoms above Se atoms (c) All P atoms above Mo atoms.

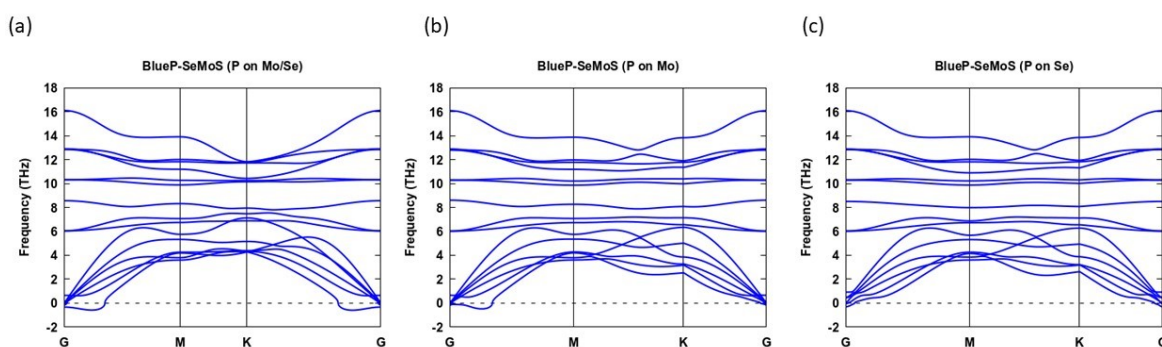

**Fig. S2 (i):** Variation of total energy with applied (a) uniaxial strain along the x-axis, (b) uniaxial strain along the y-axis, and (c) bi-biaxial strain along the x and y-axis for lithiated BlueP-SMoSe heterostructure.

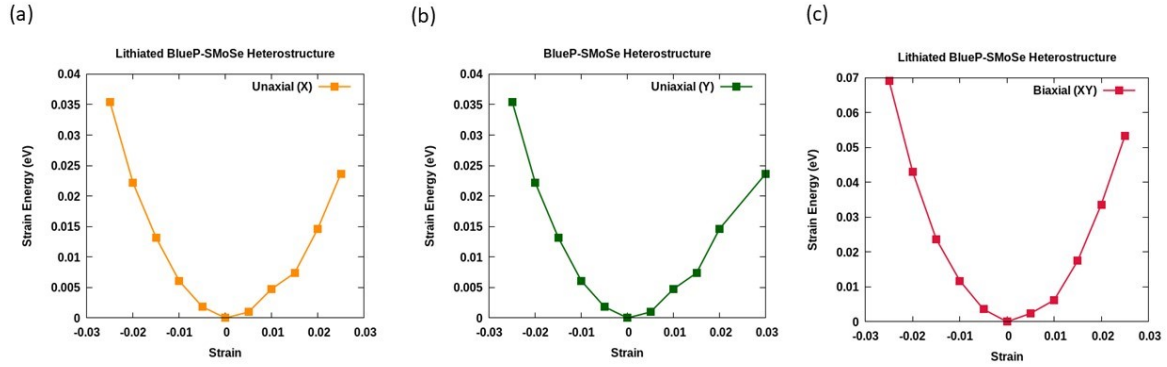

**Fig. S2 (ii):** Variation of total energy with applied (a) uniaxial strain along the x-axis, (b) uniaxial strain along the y-axis, and (c) bi-biaxial strain along the x and y-axis for lithiated BlueP-SeMoS heterostructure.

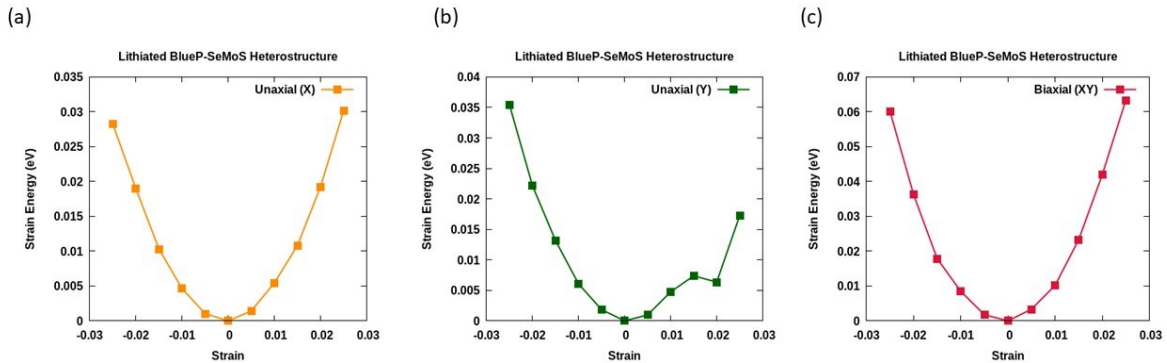

**Table S1:** The calculated Li diffusion energy when Li migrates at various surfaces and interfaces of BlueP-Janus MoSSe heterostructures from one stable adsorption location to another.

| BlueP-SMoSe Heterostructure |                     | BlueP-SeMoS Heterostructure |                     |
|-----------------------------|---------------------|-----------------------------|---------------------|
| Surface                     | Barrier Energy (eV) | Surface                     | Barrier Energy (eV) |
| Li-BlueP-SMoSe              | 0.085               | Li-BlueP-SeMoS              | 0.081               |
| BlueP-Li-SMoSe              | 0.221               | BlueP-Li-SeMoS              | 0.135               |

|                |       |                |       |
|----------------|-------|----------------|-------|
| BlueP-SMoSe-Li | 0.166 | BlueP-SeMoS-Li | 0.188 |
|----------------|-------|----------------|-------|

**Table S2:** The calculated Li diffusion coefficient when Li migrates at various surfaces and interfaces of BlueP-Janus MoSSe heterostructures from one stable adsorption location to another.

| BlueP-SMoSe Heterostructure |                                       | BlueP-SeMoS Heterostructure |                                       |
|-----------------------------|---------------------------------------|-----------------------------|---------------------------------------|
| Surface                     | Diffusion Co-efficient ( $cm^2/sec$ ) | Surface                     | Diffusion Co-efficient ( $cm^2/sec$ ) |
| Li-BlueP-SMoSe              | $6.05 \times 10^{-5}$                 | Li-BlueP-SeMoS              | $7.06 \times 10^{-5}$                 |
| BlueP-Li-SMoSe              | $3.16 \times 10^{-7}$                 | BlueP-Li-SeMoS              | $8.78 \times 10^{-6}$                 |
| BlueP-SMoSe-Li              | $2.66 \times 10^{-6}$                 | BlueP-SeMoS-Li              | $2.99 \times 10^{-8}$                 |
